# Supplementary material for: Transcriptomic landscape of Pituitary Adenomas: potential diagnostic and therapeutic targets
Source: Research Square preprint supplement (doi:10.21203/rs.3.rs-7604876/v1), 2025-09-24
Supplement: Supplementary file 1 [file 862778b5126c45c9b1fb1c87.xlsx]

## Sheet: Sheet1
Supplementary table 2 Commercial Information of Small Molecules
Applications and uses	For sale	PubChem ID	Small molecule	Target protein
Cancer treatment (thymidylate synthase inhibitor)	No	135487419	ONX0801	FOLR1
Research tool for migraine and neuropathic pain	Yes	9935648	LY466195	GRIK1
Research tool for kainate receptors	Yes	6420161	UBP302	GRIK1
Research tool for kainate receptors	Yes	6420160	UBP310	GRIK1
Research tool for synaptic plasticity	Yes	16125102	ACET	GRIK1
Research tool for neurotransmission and ischemia	Yes	3721046	CNQX	GRIK1
Research tool for neurotransmission and neuroprotection	Yes	3833541	DNQX	GRIK1
Research tool for synaptic plasticity and anticonvulsant effects	Yes	3272524	NBQX	GRIK1
