# Supplementary material for: Transcriptomic landscape of Pituitary Adenomas: potential diagnostic and therapeutic targets
Source: Research Square preprint supplement (doi:10.21203/rs.3.rs-7604876/v1), 2025-09-24
Supplement: Supplementary file 2 [file 91f679e7cd4fc8b11267c13b.xlsx]

## Sheet: Up-regulated genes
* All NFPA samples in different datasets with NFPA, Invasive or non-invasive were integrated in a new group(Merged)
ACTH VS. normal(logFC >=1)	ACTH VS. normal(logFC >=0.58)	GH VS. normal(logFC>=1)	GH VS. normal(logFC>=0.58)	Invasive VS. non-Invasiv NFPA	Invasive VS. normal	NFPA VS. normal	nonInvasive VS. normal	null VS. normal	PRL VS. normal	NFPA(Merged) VS. normal
aanat	fut9	gja4	gja4	bmp6	fut9	cnga1	kif21b	amigo2	amigo2	mad2l1
pcsk2	aanat	vwf	shc3	sult1c2	gjc1	kif21b	crygc	mad2l1	gja4	aco2
tnfrsf21	cnga1	rgs5	nudt1		pck2	slc12a1	amigo2	kif21b	mad2l1	calm1
il13ra2	mad2l1	tnfrsf21	fanci		gamt	fut9	vegfc	cnga1	vwf	ssbp2
	spink4	ppbp	vwf		pf4	astn2	cdh8	fut9	filip1l	eno2
	filip1l		apex1		pccb	amigo2	st8sia5	filip1l	rgs5	cspg5
	pcsk2		plxdc1		pth	cdh8	shc3	cdh8	tnfrsf21	gpaa1
	kif11		topbp1		atp2b2	eno2	mad2l1	btd	six6	zbtb22
	gja4		tor1a		grik1	calm1	gal3st1	ssbp2	cntn1	kif21b
	btd		smc2		mapre2	inpp5j	cnga1	ephb1	ephb1	abca3
	man2b2		aurka		abca2	grina	vdac1	eno2	inpp5j	maoa
	vwf		rgs5		frmpd1	itpr2	astn2	astn2	vegfc	inpp5j
	akap6		rnaseh2a		itga4	ca11	traip	gja4	znf212	cask
	ccnb1		urm1		ezh2	mad2l1	kcna4	rgs5	ca11	cntn1
	rgs5		hmmr		scd	kcna4	inha	akap6	gpr6	ephb1
	dbp		gtf2e1		grm8	zbtb22	idh1	cntn1	cspg5	ube2e3
	crygc		mcm2		mapk12	actr1b	pole3	dbp	pam	ca11
	actl6b		cdkn3		filip1l	gpaa1	filip1l	ccnb1	stac	mpp2
	ssbp2		gjc1		mmp16	idh1	eno2	inpp5j	nlgn1	fibp
	ephb1		btd		cib2	stx3	fig4	st8sia5	aanat	rims3
	pccb		mad2l1		slc29a1	ssbp2	cd83	pccb	cks2	cyc1
	tnfrsf21		znf132		cask	slc23a2	kif11	cspg5	ccnd1	fut9
	frat2		rfc4		lmo1	glra3	lphn3	cyc1	cdh8	frmpd1
	lgals2		filip1l		pafah1b3	eps8	pla2g1b	eps8	hcp5	dbp
	vegfc		apex2		spag5	abca3	apba1	ca11	ppbp	dck
	dnajc9		atxn2		cldn9	anxa9	scap	leprotl1	ano3	ypel1
	fgf12		ccnb1		fgf12	tpi1	lgals2	gnb3	wdr18	vegfc
	cspg5		man2b2		gclc	cdipt	actl6b	vegfc		necap1
	pin1		dbp		slc7a11	gnb3	ephb1	crygc		filip1l
	cntn1		dgke		gria3	crygc	b4galnt1	fgf12		six6
	grm8		pccb		fibp	nrg1	rgs5	dcx		stx3
	inpp5j		rabl3		neb	pcyt1b	slc12a5	tnfrsf21		frat2
	astn2		clptm1		man2b2	bai2	rab11fip5	pvrl3		dnajc9
	pik3c2g		rabepk		ppbp	cd83	glra3	katnb1		tesk2
	st8sia5		dolpp1		mad2l1	ncan	leprotl1	lrrtm2		pak3
	ca11		ephx2		clu	aco2	sncb	nup93		katnb1
	sema7a		stoml2		ypel1	has1	akap6	six6		actl6b
	znf212		aimp2		srebf1	camk2g	dbp	ncan		gnb3
	kif21b		wdr46		lgals3bp	st8sia5	tcn2	slc12a5		itpr2
	aimp2		mocs3		pfkm	cnot8	ca11	frat2		tm7sf2
	pafah1b3		ppm1f		jakmip2	mpp2	tnfrsf21	mpp2		pvrl3
	dcx		nagpa		gzmk	dnm3	tesk2	sncb		pccb
	kcna4		rpusd2		mpp2	tesk2	amhr2	pak3		lsamp
	hirip3		yipf3		atp8a1	fig4	eps8	itpr2		glce
	kcnk3		tnfrsf21		abca12	pak3	sema7a	nlgn1		clcn5
	six6		ndufb7		cog2	fibp	moap1	kcnk3		cnga1
	amigo2		hist1h2bk		onecut1	pvrl3	six6	kcna4		fig4
	tmed1		tmed1		kifap3	cspg5	dnm3	idh1		brms1
	maoa		chrna3		cyc1	ephb1	kcnk3	c5orf30		pex19
	cdh8		cks2		man2a1	six6	maoa	glce		prmt3
	il13ra2		pf4		adrb2	maoa	gja4	lsamp		leprotl1
	nlgn1		erp29			ephb6	arpc1a	vwf		c5orf30
	stac		uros			pik3c2g	pak3	pex19		tnfrsf21
	pvrl3		cops7a			actl6b	ccnb1	bai2		st8sia5
	gnb3		ppbp			fam171a1	aim1	hist2h2be		astn2
	sncb		igsf6			sncb	dnajc9	amhr2		ncan
	c5orf30		cyth2			agtpbp1	kcna3	kcna5		dpysl2
	atox1		tmem147			amhr2	cabp1	faim2		gal3st1
	gpr6		prkab1			faim2	pvrl3	lgals2		pafah1b3
	cyp11a1		pin1			gal3st1	cspg5	znf212		eps8
	faim2		akap6			slc22a4	c5orf30	supt4h1		kcnk3
	eps8		tbp			kcna3	inpp5j	fam171a1		cdh8
	kcna5		tbx2			inha	ano3	ifi44		cadm3
	ifi44		vegfc			phlda1	aco2	pafah1b3		cabp1
			hexb			scn9a	rab6b	cask		hist2h2be
			farsa			lphn3	ssbp2	ajap1		nlgn1
			golga1			dcaf7	pla2g4c	sez6l		kcna4
			rrm2			vdac1	ccng1	maoa		spag7
			dnmt1			rims3	lsamp	stac		pik3c2b
			nup93			rnf44	cyp11a1	cabp1		pskh1
			pex1			hdac3	naaladl1	hlf		slc22a4
			kif20b			dock3	vps72	cyp11a1		faim2
			thy1			ypel1	hdc	tm7sf2		hirip3
			amigo2			itga4	tm7sf2	hirip3		h1fx
			psmc2			vrk1	fev	pik3c2g		bai2
			osgep			tm7sf2	pik3c2g	dpysl3		sncb
			ttf2			cntn1	aanat	slc22a4		kcna5
			slc37a4			slc12a5	ptprn	slc8a1		scd
			wbscr22			csrp1	scn2b	clu		clu
			zfp37			wdr47	pde6h	pitx2		srebf1
			pola2			scap	tln1	pam		atox1
			ndufa7			dck	pitx2	scd		ifi44
			slc26a4			cabp1	tpst2	rab6b		amhr2
			akr1b10			mapk9	ephb6	aanat		kcna3
			psap			gclc	gabbr2	ephb6		rab11fip5
			cdc20			pitx2	crabp1	atox1		idh1
			fgf12			znf467	pnma2	pla2g1b		amigo2
			adrb2			ube2e3	tbc1d9	rcan2		plk2
			hirip3			tcn2	frat2	lrrn3		pitx2
						paqr4	dpysl3	pfkm		rgs5
						kif11	adra2a	col2a1		fam171a1
						gamt	atox1	pcsk2		scn9a
						kcna5	mpl	atrnl1		tcn2
						kcnk3	sez6l	aim1		rapgef4
						mcf2	hist1h2bk	mcf2		peg10
						elovl2	crabp2	spock1		fbxl7
						pcsk2	spock1	hist1h1c		vwf
						fbxl7	ccdc69	gpr6		glra3
						rab5b	hlf	lphn3		slc12a5
						prmt3		spock3		fh
						atp2b1		mllt11		elovl2
						lsamp		dbi		pik3c2g
						syn2		cntn6		slc12a1
						glce		kcna3		cib2
						clcn5		hist1h2ac		lgals2
						lgals2		sh3gl3		cd83
						sez6l		fh		lphn3
						gabbr2		ano3		pfkm
						apba1		ccnd1		hist1h1c
						spock3		fev		ccnd1
						crabp1		csrp2		cyp11a1
						c5orf30		ggh		dbi
						dhcr24		wdr18		crygc
						cnih3		gata3		aim1
						hdac1		fam110b		dnm3
						filip1l		cdh2		spock3
						ccdc69		crygd		crabp1
						dcx		adra2a		dhcr24
						map3k4		stmn2		wdr18
						clu		dhcr24		pde6h
						tgoln2				aip
						hmgn4				mpl
						srebf1				slc8a1
						csrp2				hlf
						naaladl1				rcan2
						frmpd1				gabbr2
						cyc1				gpr6
						pik3c2b				rab6b
						rab11fip5				lrrtm2
						dpysl3				col2a1
						lrrtm2				map3k4
						hist2h2be				stac
						dbp				dpysl3
						pex19				lrrn3
						frat2				adra2a
						luzp1				hdc
						vegfc				csrp2
						pla2g1b				ephb6
						tnfrsf21				sez6l
						gata3				ccdc69
						btd				mcf2
						kl				fev
						pias1				hist1h2ac
						bcl9				dcx
						ppp2r1a				ajap1
						lrrn3				sfrp1
						adra2a				sgk1
						ssfa2				trappc3
						efnb3				fam110b
						auh				ano3
						sema4f				kl
						mrpl9				spock1
						hs2st1				aanat
						fev				mllt11
						smarcd3				slc8a2
						btg1				cntn6
						cyp11a1				stmn2
						gata2				pla2g1b
						akap6				nr0b1
						ajap1				crabp2
						spock1				cd52
						h1fx				crygd
						wasf1				gata3
						pccb				cdh2
						scn2b				sh3gl3
						ttll12				neurod1
						aanat				pcsk2
						rab6b
						katnb1
						leprotl1
						b4galnt1
						ifi44
						nlgn1
						pskh1
						pak7
						moap1
						hlf
						adam23
						chd1l
						pde6h
						spag7
						atrnl1
						cadm3
						slc25a11
						tnfrsf11b
						dnajc9
						timp2
						kcnd3
						sfrp1
						cib2
						tmem109
						pafah1b3
						brms1
						aim1
						cask
						rnd2
						dnajc11
						arpc1a
						cox8a
						rgs5
						cyp2c18
						plk2
						dpysl2
						wasf3
						necap1
						crabp2
						ano3
						ankrd6
						sema7a
						pin1
						stmn2
						mpl
						dbi
						supt4h1
						kal1
						hist1h1c
						prkrir
						rapgef4
						bub1b
						stac
						b3galt2
						sall2
						pdlim1
						srr
						mapk12
						pbx1
						vps72
						sgpl1
						irf6
						col2a1
						hdc
						cryba1
						uba3
						slc9a3r1
						hirip3
						atox1
						rcan2
						sh3gl3
						gpn1
						scd
						aip
						tpst2
						tspan1
						prkab2
						nr0b1
						slc7a11
						acat1
						fam110b
						ramp1
						cldn9
						sftpd
						iars2
						fchsd2
						fh
						gfra2
						cd52
						znf212
						atp1b2
						mt3
						loxl1
						cdc42ep3
						nrxn1
						cd200
						hmgcl
						msh6
						mllt11
						pea15
						efs
						tmem159
						crip2
						cdh2
						ccnd1
						dusp10
						lasp1
						pitx1
						fgf12
						atp6v1a
						neurod1
						cx3cr1
						cacna2d1
						epb41l3
						vwf
						hist1h2ac
						slc8a2
						tbc1d9
						cntn6
						tmem115
						sgk1
						slc8a1
						crygd
						gpr6
						nsdhl
						sdc2
						sdhb
						cdh3
						chrna5
						tiparp
						vsnl1
						atp1a2
						peg10
						ptpn3
						ndufs7
						pfkm
						hist1h2be
						pla2g4c
						folr1
						dhrs2
						akr7a2
						kifap3
						ifit1
						mapk13
						st8sia1
						cdkn1b
						tsr2
						gchfr
						nr1h3
						lrp4
						tnnt1
						cct4
						pnma2
						chga
						trappc3
						irx5
						marcksl1
						lyrm1
						ar
						cobll1
						hist1h2ae
						epas1
						ly6h
						wdr18
						abo
						msx1
						sdc4
						cox7a1
						tle2
						phb
						hcp5
						tmprss6
						cited1
						rrm1
						ccnd2
						fgf13
						serpinf1
						ifi44l
						rundc3b
						grp
						tubb3

## Sheet: Down-regulated genes
* All NFPA samples in different datasets with NFPA, Invasive or non-invasive were integrated in a new group(Merged)
ACTH VS. normal	GH VS. normal	Invasive VS. Non-Invasive	Invasive VS. normal	NFPA VS. normal	Non-Invasive VS. normal	Null VS. normal	PRL VS. normal	NFPA(Merged*) VS. normal
cshl1	igfbp5	crygc	cshl1	cshl1	cshl1	cshl1	cshl1	cshl1
s100b	gal	amigo2	gpc3	dlk1	gal	gal	gal	gal
gal	cryab		gal	gh1	areg	gh1	tshb	gh1
fabp7	pax6		tshb	dhrs3	gh1	dlk1	gh1	pomc
pomc	pmaip1		cga	slit1	tbx19	areg	pomc	gh2
gh1	sox9		gh1	irak3	ezr	pomc	dlk1	dlk1
igfbp6	id1		sox9	gh2	chrdl1	tshb	cryab	hip1r
id1	rarres2		nptx2	cnr1	mettl7a	pax6	igfbp6	rab27a
dlk1	igfbp6		dlk1	plagl1	dlk1	igfbp6	igfbp5	cga
cga	islr		igfbp6	rab27a	clic5	zfp36l1	pax6	cnr1
zfp36l1	ephx1		rab27a	fam49a	sorbs2	sox9	pmaip1	gpm6b
tshb	fzd7		fabp7	rfx4	pmaip1	adh1b	zfp36l1	slit1
cryab	zfp36l1		adam28	hip1r	cck	islr	id1	sorbs2
sox9	pomc		fzd7	aldh2	cnr1	sorbs2	rarres2	gadd45g
sat1	col4a6		agr2	isg20	gprc5b	pmaip1	gh2	tle3
islr	tshb		fam107a	ghrhr	id4	gh2	fabp7	sall1
rarres2	fam107a		sox2	gprc5b	fgfr3	ghrhr	cga	igfbp6
igfbp5	igfbp3		hp	pou1f1	slit2	id1	ezr	ltbp1
fzd7	litaf		dlec1	meg3	pax6	adam28	gpc3	sell
agr2	gpc4		prl	gal	zfp36l1	rarres2	col4a6	irak3
fmod	slit2		col4a6	enpp1	gas1	efemp1	agr2	pon3
pmaip1	sat1		syt17	rpgr	cebpd	dhrs3	sox9	sox9
efemp1	gja1		baiap3	pomc	pomc	cryab	sat1	ezr
gpc3	gadd45b		sat1	dlg5	tshb	col4a6	chrdl1	pck1
sox2	sox2		pomc	rps6ka2	tle3	igfbp5	ghrhr	ghrhr
nupr1	gpc3		adh1b	abca8	gh2	chrdl1	bbox1	zfp36l1
ghrhr	hes1		sparcl1	cebpd	celsr1	fbln1	id4	col9a2
chrdl1	tdo2		fgf1	enosf1	gadd45g	sat1	islr	dfna5
id4	fbn2		ghrhr	ezr	eya4	serping1	fzd7	fbn2
sell	cyp4b1		mia	tshb	id1	hip1r	slit1	itpr3
gh2	ascl1		rbp4	mettl7a	crlf1	fbn2	litaf	pax6
ptgds	aebp1		igfbp3	ifngr2	il6r	cyp4b1	efemp1	hspa2
igfbp3	cga		gpc4	stat3	ch25h	tdo2	dhrs3	agr2
ch25h	gas1		shank2	gadd45g	id2	gas1	gas1	enosf1
slit2	fmod		gh2	usp13	sell	fzd7	sorbs2	chd5
mfap4	yap1		rarres2	fam98a	stat3	slit1	celsr1	thbs4
sall1	prss8		lmo4	sorbs2	krt18	bbox1	sell	dhrs3
cyp4b1	adh1b		slit1	kcnj6	blm	hes1	adh1b	bbox1
cck	id4		col4a4	pdlim4	gadd45b	plagl1	prss8	meg3
bbox1	lypd1		wfdc2	tbx19	btg2	nupr1	igfbp3	pdlim4
nptx2	s100a10		phyhip	nupr1	hspa2	cga	fbn2	dlec1
gja1	cck		bambi	rrbp1	dhrs3	blm	fmod	efemp1
mgp	art3		ephx1	clic5	creb3l2	gadd45b	pon3	fat1
thbs4	sparcl1		igfbp5	kdelr3	cryab	rpgr	tbx19	krt18
gpm6b	serping1		slc16a2	cacna1b	krt8	rnase4	blm	sat1
gadd45b	pdlim3		islr	fbn2	st18	irak3	nptx2	chrdl1
ezr	col4a5		f5	gpm6b	dnase1	isg20	hspa2	jup
gadd45g	chrdl1		bbox1	sell	mpzl2	ptpn14	cck	abca8
hp	tpbg		slc27a2	fbln1	slit1	cebpd	rpgr	f5
tbx19	ch25h		rnf144a	dscam	nefm	abca8	fam107a	col4a6
isg20	fbln5		fbn2	zfp36l1	aldh2	tle3	sox2	nptx2
pon3	s100a11		id1	itpr3	fam49a	fabp7	sall1	pou1f1
hsd11b1	agr2		prss8	fat1	meg3	ezr	rnase4	tnnc1
fam107a	inhbb		fshb	u2af1	kiaa0513	fmod	gadd45g	isg20
mia	bambi		rps6ka2	chrdl1	dscam	gadd45g	gadd45b	gprc5b
hspa2	maff		hsd11b1	nptx2	cdkn2a	krt18	nupr1	lgals3
chd5	mgp		tnfrsf25	pax6	fst	sox2	tdo2	hsd11b1
id3	sdc4		s100b	kiaa0513	ptpn14	sall1	hip1r	rfx4
f3	id3		col9a2	wipi1	igfbp5	rab27a	dlec1	clic5
slpi	thbd		prss16	cnga3	nr4a2	celsr1	gja1	fabp7
sparcl1	id2		hes1	phactr2	fbn2	slit2	serping1	sox2
dfna5	efemp1		gnrhr	blm	col4a6	nptx2	cxcr4	ptpn14
tgfbi	gnrhr		inhbb	lgals3	bmp6	gja1	ephx1	aldh2
lgals3	dsp		tdo2	sox9	fbln1	dlec1	slit2	cdkn2a
nr4a2	homer1		etv5	itgbl1	rpgr	mpzl2	inhbb	scnn1a
gnrhr	fabp7		galnt3	bcat1	lrig1	fam49a	mfap4	fam49a
plagl1	mt1x		slpi	iqck	fermt2	mfap4	aldh2	fzd7
ifitm2	cldn7		fmod	col4a4	hes1	sell	itgbl1	id1
ifitm3	bbox1		ddx3y	krt18	wnt5a	agr2	hes1	enpp1
krt18	mfap4		tcf21	pdgfra	fosl2	pdgfra	art3	col4a4
ascl1	emp1		mpped2	sall1	col4a5	c1s	nfib	kcnj6
ifitm1	dusp2		celsr1	efemp1	irak3	gpm6b	fgfr3	slc4a4
fat1	dsg2		hip1r	tiam1	bbox1	litaf	zfp36l2	nfib
meg3	tgfbr3		hpcal1	pck1	tdo2	mettl7a	nnat	plagl1
il6	lgi1		ass1	dfna5	pdgfra	col4a5	f3	itgbl1
klk11	f3		gfap	creb3l2	f3	gpc3	col4a5	tshb
chi3l1	ier3		odc1	agr2	tnnc1	yap1	mpzl2	ptprk
col4a4	ccl2		pde9a	gtf3a	tmsb10	prss8	id2	id4
nefh	tbx19		prelp	ltbp1	nefh	tnnc1	krt18	islr
scnn1a	cux2		cldn7	fabp7	tln2	aebp1	thbs4	fermt2
pck1	cntnap2		cntn2	islr	zfp36l2	itgbl1	abca8	fmod
apod	anxa1		pax6	stk3	igfbp6	gprc5b	cebpd	kdelr3
gpc4	slc16a2		myo7a	pdia4	dusp2	kiaa0513	aebp1	col4a5
zbtb16	mia		rfx4	ptpn14	nnat	tbx19	klhl21	creb3l2
prl	fgfr3		gstm5	lrig1	ptprd	cdkn2a	mia	nupr1
adm	crym		sall1	sat1	hip1r	nfib	isg20	mfap4
wif1	itga8		tf	dlec1	tfeb	prelp	st18	or7a5
pou1f1	fcn2		tnfrsf1a	ptprk	plagl1	cnr1	ch25h	tiam1
nnat	wfdc2		pdlim3	cntn2	fam98a	mgp	eya4	fam98a
ccl2	nupr1		asap2	tcf7l2	cxcr4	f5	tgfbr3	dclk1
serpina3	cxcr4		igfbp2	timp4	efemp1	pou1f1	rbp4	atp11a
thbs2	vim		mgp	atp11a	nefl	pdlim4	dusp2	kiaa0513
rbp4	sall1		scrg1	pdgfrl	bmpr1b	inhbb	zbtb16	prss8
bcat1	spon1		kcnn3	phyhip	itpr3	phactr2	tgm2	pmaip1
scgb2a1	hp		klk11	fgf9	rasl10a	lgals3	slpi	tst
aldh1a1	ppl		dpp6	syt17	litaf	zfp36l2	mettl7a	igfbp5
nts	mt1f		gng5	zcchc24	ptgds	meg3	fbln1	pxdn
	sell		akap12	cdkn2b	gpm6b	cxcr4	selenbp1	stk3
	serpinf1		dgkg	sh3pxd2a	mnx1	pdlim3	pdlim3	satb1
	fshb		kcnd2	adam28	nfil3	nr4a2	cyp4b1	bcat1
	adm		col4a3	rpn1	cyp4b1	dfna5	tf	myo7a
	ptn		scnn1a	tle3	aldob	tgm2	gprc5b	pdlim3
	eya4		efemp1	f5	pdgfrl	thbs4	sparcl1	timp4
	cnn3		per2	slc16a4	calb1	pmp22	wnt5a	prl
	chd5		cyp4b1	jup	islr	id4	tspan8	adh1b
	c1r		lypd1	ass1	tcf7l2	igfbp3	s100a10	blm
	hspb3		pou1f1	dclk1	nupr1	zbtb16	tmsb10	yap1
	il6		rnase4	or7a5	sall1	c1r	id3	pamr1
	klk11		slc4a4	ppp1r3d	klf5	fat1	chd5	wnt5a
	c1s		dclk1	col9a2	ghrhr	fam98a	yap1	inhbb
	gpm6b		pamr1	htatsf1	rarres2	hp	mgp	thbs2
	mt2a		pmaip1	pmp22	ascl1	thbd	nefm	syt17
	ifitm3		rimbp2	il6r	fzd7	igfbp2	gpc4	sema3a
	tubb2b		zfp36l1	per2	enosf1	dusp2	tnnc1	ass1
	fgf13		kcnj6	tnfrsf11a	pdlim3	slc16a4	tpbg	cryab
	rgs4		gnal	col4a5	stk3	kcnj6	klk11	angpt1
	lgals3		fgf2	satb1	fxyd3	col4a4	lmo4	rps6ka2
	calb1		col11a2	emp2	dfna5	aldh2	jup	cacna1b
	pon3		thbs4	igfbp6	ier2	pck1	fhl2	igfbp3
	fhl2		lgi1	tspan8	itgbl1	il6r	fbln5	rnase4
	col21a1		yap1	adh1b	fcn2	jup	hsd11b1	sema5a
	akr1c3		cryab	ninj1	serping1	ch25h	enosf1	rpgr
	timp3		cyb5a	cdkn2a	zbtb16	myo7a	thbd	rrbp1
	serpine2		tnnc1	tdo2	pon3	hsd11b1	mnx1	ccno
	nfil3		itga8	trip13	thbs4	ltbp1	tgfbi	cntn2
	chi3l1		fam114a1	c9orf3	nr4a3	anxa2	ccl2	pdgfra
	scrg1		ptn	tnnc1	pdlim4	itpr3	mt1x	fbln1
	slpi		kif5c	col4a6	spon1	ifitm1	gnrhr	tcf7l2
	ptx3		sdc4	prl	ppic	efna1	nefh	wipi1
	nfix			tmem158	cacna1b	rps6ka2	dfna5	cebpd
	ifitm2			fam114a1	mfap4	enpp1	plagl1	col4a3
	btg2			ppic	art3	prl	cux2	gas1
	hspa2			hspa2	cga	hspa2	spon1	alk
	nefm			tmsb10	ppfia2	maff	f5	tbx19
	ptgds			foxo1	tspan8	art3	chst15	hes1
	col11a1			fam65b	fat1	tfeb	myo7a	tdo2
	krt18			rbbp8	sox9	wnt5a	pmp22	phyhip
	wif1			etv5	cd79b	chd5	apod	cyp4b1
	nr4a2			chst1	sox2	col9a2	c1s	dnali1
	bche			fermt2	rnase4	slpi	vamp8	fgf9
	serpina3			arhgef10	alk	cck	fermt2	phgdh
	nptx2			bicc1	atp11a	ifitm2	scrg1	igfbp2
	eya1			hsd11b1	hspb3	anxa1	hp	rarres2
	hsd11b1			eya4	cux2	enosf1	dnali1	htatsf1
	thbs4			etv1	rab31	rfx4	ptn	eya4
	zbtb16			msn	nfib	tmsb10	ier3	cd79b
	folr1			pip5k1b	cdkn1c	ifitm3	cntnap2	fam114a1
	gem			aff2	yap1	tspan8	hspb3	asap2
	scnn1a			fam3c	wipi1	slc4a4	slc16a2	ptprz1
	cshl1			impa2	gja1	cux2	ppl	chst1
	junb			pamr1	pkp3	zcchc24	pxdn	slit2
				tst	txnip	pon3	lypd1	gpc3
				sgcd	gramd4	fcn2	cldn3	phactr2
				pon3	palld	chst15	ptgds	sh3pxd2a
				thbs4	abca8	bcat1	gpm6b	rxra
				por	sash1	nefh	or7a5	serping1
				fosl2	sfrp4	cfi	foxo1	gtf3a
				kif5c	nptx1	fam107a	itga8	lmo4
				wnt5a	nfix	selenbp1	igfbp2	col9a3
				ppap2c	scgb2a1	ascl1	cd79b	prph2
				nefh	edn3	btg2	lgi1	nr4a2
				thbs2	sema3a	or7a5	nfil3	etv5
				slc4a4	kcnb2	fbln5	phactr2	pmp22
				tln2	chd5	col18a1	ifitm3	fam65b
				utrn	met	znf536	cartpt	tspan8
				ppp2r5a	fabp7	rrbp1	c1r	aff2
				c1s	ficd	id2	s100a11	mettl7a
				alk	isg20	tgfbi	emp1	slpi
				sox2	gabrb1	il1r1	wfdc2	zfp36l2
				nfib	pck1	ccl2	aldob	znf536
				slc1a1	sox3	f3	ifitm2	mia
				pdlim3	col11a1	plin2	col9a2	nts
				gramd4	bcat1	cnga3	akr1c3	gpnmb
				il1r1	thbs2	tcf7l2	ascl1	gja1
				arid3a	pou1f1	eya4	irak3	nefh
				prune2	fmod	aldh1a3	rarres1	gramd4
				znf536	znf536	s100a10	scgb2a1	akap12
				lin7a	cntnap2	crlf1	vim	prlr
				angpt1	id3	pxdn	cnn3	myo10
				gpnmb	slc1a1	alk	mt1f	wfs1
				cyp1b1	il7r	apod	fshb	gldc
				cyp4b1	s100a10	fhl2	maff	lin7a
				rgs16	klhl21	cd79b	fcn2	cd99
				bbox1	sat1	id3	abcc8	gnal
				nnat	enpp1	kdelr3	ltbp1	cxcr4
				mpzl2	phactr2	ier3	cebpb	slc6a15
				dgkg	kdelr3	fxyd3	cnr1	tmem158
				ints3	ccl2	ass1	crym	ppic
				fmod	or7a5	dusp6	calb1	ifitm1
				rxra	gtf3a	fermt2	mdk	nov
				cd99	ltbp1	krt8	chi3l1	aldh1a3
				sema5a	cldn3	fgfr3	anxa1	mgp
				col4a3	stk38	rarres1	dsp	hs3st1
				anxa2	slc39a8	phyhip	ifitm1	msn
				pxdn		nr2f1	bcl6	fcn2
				serping1		tst	btg2	cnga3
				ifitm1		cyp1b1	hcls1	pip5k1b
				sec24d		mia	nell1	aebp1
				tgm2		wipi1	nr2f1	ryr3
				snapc1		nnat	eya1	pdgfrl
				myo7a		klhl21	ctgf	aldh1a1
				prss8		vim	krt19	anxa2
				tgfbi		scnn1a	col4a4	cux2
				prlr		cacna1b	wif1	ppp1r3d
				gnal		adm	lum	met
				mfap4		klf5	serpina3	impa2
				gas1		ier2	adm	fhl2
				znf10		ppic	lmo3	lgals1
				prph2		emp1	six3	tnfrsf14
				slc6a15		ptgds	sdc4	lypd1
				aldh1a3		fgf9	phgdh	nfix
				slc46a3		angpt1	bambi	tgfbi
				fgfr3		fosl2	s100a1	nell1
				hpcal1		nr4a3	fnbp1	ascl1
				gabrb1		tmem158	cd24	gabrb1
				rgs7		lmo4	fmo2	rgs16
				zfp36l2		stk3	cldn7	c1s
				tfeb		col4a3	lgals3	apod
				ly96		cp	aldh1a3	ifitm2
				id4		cbs	mamld1	bicc1
				selenbp1		itga8	nefl	slc16a2
				dap		hs3st1	anxa3	cbs
				tox3		ryr3	ptx3	fxyd3
				ap3b1		thbs1	scnn1a	art3
				scnn1a		timp4	cp	ifitm3
				akap12		thbs2	il6	cck
				cd79b		ficd	nptx1	nr2f1
				chsy1		bicc1	gabrb1	col18a1
				nr4a2		cntn2	fat1	c9orf3
				ptprz1		odc1	fmo5	itga8
				art3		il7r	nr4a2	ptgds
				slpi		ccno	aldoc	chsy1
				dnali1		impa2	serpine2	zcchc24
				anxa1		rgs16	ca4	tox3
				coro2a		chi3l1	col21a1	rab31
				pmaip1		ppp1r3d	cyr61	itm2a
				yap1		rab31	tiam1	crlf1
				osbpl3		chst1	serpinf1	tnfrsf11a
				calu		ephx1	thbs2	nnat
				mthfd2		mertk	rxrg	nefm
				ptprg		klk11		il6r
				sash1		vamp8		cntnap2
				igfbp2		tgfbr3		pcolce
				cryab		junb		kcnj3
				wfs1		tiam1		dusp2
				prkch		twist1		cyp1b1
				cga		akr1c3		anxa1
				ccno		serpina3		fgfr3
				ficd		cldn3		f3
				lmo4		chsy1		il1r1
				zbtb16		dusp5		foxo1
				rnase4		gpnmb		ca4
				psme4		pdgfrl		scrg1
				ap3s1		srgn		aldoc
				chst15		gem		ppfia2
				ptgds		sparcl1		id3
				zhx2		slc16a2		ch25h
				nov		gramd4		fosl2
				chd5		msn		tfpi2
				cck		ptx3		akr1c3
				fzd7		slc6a15		vim
				ryr3		lypd1		gadd45b
				gnl2		cfh		hp
				lrp8		tox3		gem
				rab31		rxra		btg2
				col9a3		syt17		klk11
				olfm1		cebpb		nr4a3
				met		sash1		gnrhr
				kit		ptprk		lum
				crlf1		dnase1l3		zbtb16
				ptprd		stc1		fmo2
				mia		met		scgb2a1
				col18a1		zfp36		ly96
				phgdh		ptn		aldob
				cux2		sema5a		wif1
				sema3a		scgb2a1		ptx3
				nts		fmo2		igsf1
				ntrk2		satb1		thbd
				nr2f1		gabrb1		pcsk1
				mgp		tpbg		cbln1
				inhbb		klrd1		ccl2
				ifitm2		nfix		cartpt
				mn1		gnrhr		rarres1
				myo10		bcl6		spon1
				slit2		pdk4		nr4a1
				ralgds		cd99		gbp2
				cxcr4		nell1		nptx1
				il7r		lgals1		chi3l1
				dusp4		dclk1		fam107a
				slc7a1		lin7a		kcnd2
				thbs1		abcc8		cp
				pcsk5		itm2a		dusp5
				igsf1		wif1		trpc3
				rarres2		nov		rbp4
				itga8		col16a1		igfbp4
				kcnj3		pip5k1b		hspb3
				ybx1		asap2		ralyl
				aebp1		nfil3		adm
				ppfia2		cntnap2		serpina3
				apod		foxo1
				hs3st1		pamr1
				lgals1		lum
				aldoc		arc
				gpc3		nr4a1
				fxyd3		nptx1
				jak1		pcolce
				fst		tfpi2
				ifitm3		nefm
				nr4a3		stat6
				id1		srpx
				bdnf		vcam1
				tnfrsf14		sfrp4
				slc16a2		sorcs3
				fhl2		sema3a
				klrd1		fos
				cpne6		ctgf
				dusp2		hspb3
				igfbp3		myo10
				asap2		foxc1
				ch25h		col9a3
				pdk4		ly96
				gbp2		reln
				gem		rbp4
				c10orf10		aldob
				rarres1		c10orf10
				lum		egr1
				hp		gbp2
				nfix		cyr61
				twist1		six3
				tfpi2		spry2
				cntnap2		tnfrsf14
				tcfl5		c7
				chi3l1		igfbp4
				cp		scrg1
				wif1		aldh1a1
				aldh1a1		bambi
				lypd1		slc7a5
				kcnd2		gldc
				scrg1		il6
				ckb		f13a1
				f3		spon1
				vcam1		wfs1
				vim		phgdh
				gja1		nts
				ascl1		cartpt
				pcolce		ca4
				ptx3		calb1
				scgb1d2		aldoc
				ralyl		ptprz1
				necab2		kcnd2
				nell1		timp3
				aldob		cd24
				nptx1		cyp3a5
				sstr2		igsf1
				hspb3		gnmt
				nefm		nefl
				sorcs3		ltf
				itm2a		gpc4
				btg2		scgn
				igfbp4
				cbln1
				arg2
				opcml
				trpc3
				gldc
				cbs
				tgfbr3
				cartpt
				fmo2
				ca4
				fmo5
				ccl2
				col1a2
				dusp5
				serpina3
				scgb2a1
				pcdh8

## Sheet: Shared ups-downs between all
Shared between ACTH-GH-Invasive and non-Invasive-NFPA-Null-PRL-NFPA(Merged) compared with normal pituitary tissues
Down-regulated	Up-regulated
gal	mad2l1
cryab	filip1l
pmaip1
sox9
id1
rarres2
igfbp6
islr
fzd7
zfp36l1
pomc
tshb
sat1
sox2
cyp4b1
cga
fmod
efemp1
fabp7
bbox1
sall1
thbs4
cshl1

## Sheet: Type-specific deregulated genes
Type specific up-regulated genes							Type specific down-regulated genes
ACTH	GH	Invasive NFPA	Non-Invasive NFPA	NFPA	Null		GH	Invasive NFPA	NFPA	non-Invasive NFPA	null	PRL
spink4	nudt1	pck2	traip	slc12a1	ggh		homer1	baiap3	dlg5	dnase1	efna1	mdk
	fanci	pth	pole3	calm1			dsg2	fgf1	ifngr2	bmp6	cfi	hcls1
	apex1	atp2b2	ccng1	grina			mt2a	shank2	usp13	bmpr1b	plin2	krt19
	plxdc1	grik1	ptprn	zbtb22			tubb2b	slc27a2	u2af1	rasl10a	dusp6	lmo3
	topbp1	mapre2	tln1	actr1b			fgf13	rnf144a	iqck	cdkn1c	mertk	s100a1
	tor1a	abca2		gpaa1			rgs4	tnfrsf25	pdia4	pkp3	srgn	fnbp1
	smc2	ezh2		stx3			bche	prss16	cdkn2b	txnip	cfh	mamld1
	aurka	mmp16		slc23a2			folr1	galnt3	sh3pxd2a	palld	dnase1l3	anxa3
	rnaseh2a	slc29a1		abca3				ddx3y	rpn1	edn3	stc1	rxrg
	urm1	lmo1		anxa9				tcf21	htatsf1	kcnb2	zfp36
	hmmr	spag5		tpi1				mpped2	tnfrsf11a	sox3	col16a1
	gtf2e1	gria3		cdipt				gfap	emp2	stk38	arc
	mcm2	neb		nrg1				pde9a	ninj1	slc39a8	nr4a1
	cdkn3	lgals3bp		pcyt1b				gstm5	trip13		stat6
	znf132	jakmip2		has1				tnfrsf1a	c9orf3		srpx
	rfc4	gzmk		camk2g				kcnn3	fam65b		fos
	apex2	atp8a1		cnot8				dpp6	rbbp8		foxc1
	atxn2	abca12		agtpbp1				gng5	arhgef10		reln
	dgke	cog2		phlda1				rimbp2	etv1		egr1
	rabl3	onecut1		scn9a				fgf2	aff2		spry2
	clptm1	man2a1		dcaf7				col11a2	fam3c		c7
	rabepk			rims3				cyb5a	sgcd		slc7a5
	dolpp1			rnf44					por		f13a1
	ephx2			hdac3					ppap2c		cyp3a5
	stoml2			dock3					utrn		gnmt
	wdr46			vrk1					ppp2r5a		ltf
	mocs3			csrp1					arid3a		scgn
	ppm1f			wdr47					prune2
	nagpa			dck					ints3
	rpusd2			mapk9					sec24d
	yipf3			znf467					snapc1
	ndufb7			ube2e3					prlr
	chrna3			paqr4					znf10
	erp29			elovl2					prph2
	uros			fbxl7					slc46a3
	cops7a			rab5b					rgs7
	igsf6			prmt3					dap
	cyth2			atp2b1					ap3b1
	tmem147			syn2					coro2a
	prkab1			clcn5					osbpl3
	tbp			cnih3					calu
	tbx2			hdac1					mthfd2
	hexb			map3k4					ptprg
	farsa			tgoln2					prkch
	golga1			hmgn4					psme4
	rrm2			pik3c2b					ap3s1
	dnmt1			luzp1					zhx2
	pex1			kl					gnl2
	kif20b			pias1					lrp8
	thy1			bcl9					olfm1
	psmc2			ppp2r1a					kit
	osgep			ssfa2					ntrk2
	ttf2			efnb3					mn1
	slc37a4			auh					ralgds
	wbscr22			sema4f					dusp4
	zfp37			mrpl9					slc7a1
	pola2			hs2st1					pcsk5
	ndufa7			smarcd3					kcnj3
	slc26a4			btg1					ybx1
	akr1b10			gata2					jak1
	psap			h1fx					bdnf
	cdc20			wasf1					cpne6
				ttll12					tcfl5
				pskh1					ckb
				pak7					scgb1d2
				adam23					ralyl
				chd1l					necab2
				spag7					sstr2
				cadm3					cbln1
				slc25a11					arg2
				tnfrsf11b					opcml
				timp2					trpc3
				kcnd3					col1a2
				sfrp1					pcdh8
				tmem109
				brms1
				rnd2
				dnajc11
				cox8a
				cyp2c18
				plk2
				dpysl2
				wasf3
				necap1
				ankrd6
				kal1
				prkrir
				rapgef4
				bub1b
				b3galt2
				sall2
				pdlim1
				srr
				pbx1
				sgpl1
				irf6
				cryba1
				uba3
				slc9a3r1
				gpn1
				aip
				tspan1
				prkab2
				nr0b1
				acat1
				ramp1
				sftpd
				iars2
				fchsd2
				gfra2
				cd52
				atp1b2
				mt3
				loxl1
				cdc42ep3
				nrxn1
				cd200
				hmgcl
				msh6
				pea15
				efs
				tmem159
				crip2
				dusp10
				lasp1
				pitx1
				atp6v1a
				neurod1
				cx3cr1
				cacna2d1
				epb41l3
				slc8a2
				tmem115
				sgk1
				nsdhl
				sdc2
				sdhb
				cdh3
				chrna5
				tiparp
				vsnl1
				atp1a2
				peg10
				ptpn3
				ndufs7
				hist1h2be
				folr1
				dhrs2
				akr7a2
				ifit1
				mapk13
				st8sia1
				cdkn1b
				tsr2
				gchfr
				nr1h3
				lrp4
				tnnt1
				cct4
				chga
				trappc3
				irx5
				marcksl1
				lyrm1
				ar
				cobll1
				hist1h2ae
				epas1
				ly6h
				abo
				msx1
				sdc4
				cox7a1
				tle2
				phb
				tmprss6
				cited1
				rrm1
				ccnd2
				fgf13
				serpinf1
				ifi44l
				rundc3b
				grp
				tubb3
