# Supplementary material for: Transcriptomic landscape of Pituitary Adenomas: potential diagnostic and therapeutic targets
Source: Research Square preprint supplement (doi:10.21203/rs.3.rs-7604876/v1), 2025-09-24
Supplement: Supplementary file 3 [file 9d1cc84b530caa1d15e839da.xlsx]

## Sheet: Sheet1
Supplementary Table 1: Identifiers of the Three-Dimensional Structures of FOLR1, GRIK1, and TLN1 Proteins
PDB ID	Target protein
4LRH	FOLR1
4MF3	GRIK1
1SYQ	TLN1
